# Supplementary material
Source: Springer Nature journal article supplement (https://www.springermedizin.de/resource/supplementary/13023_2014_771_MOESM3_ESM.pdf/9643036)

**A**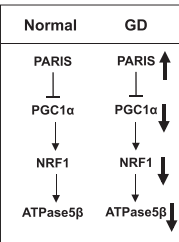**B**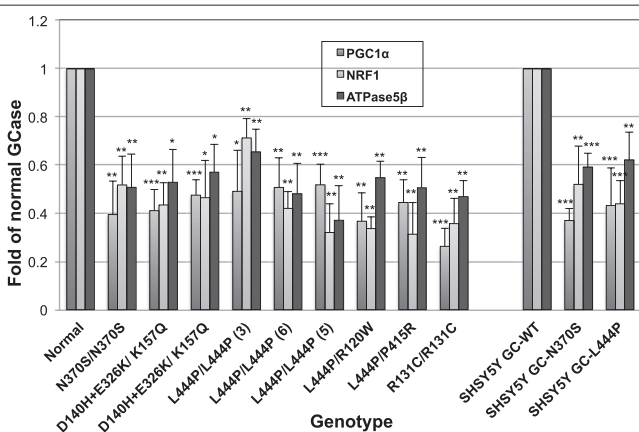

Supplement: MOESM3 [file 9643036]
